# Supplementary material for: Effectiveness of vaccination against SARS-CoV-2 infection and Covid-19 hospitalisation among Finnish elderly and chronically ill—An interim analysis of a nationwide cohort study
Source: PubMed Central journal article supplement (PMC8601574; doi:10.1371/journal.pone.0258704), 2021-11-18
Supplement: pone.0258704.s001.pdf [file pone.0258704.s001.pdf]

**S1 Table:** Definition of medical conditions (highly) predisposing to severe Covid-19.

| Medical condition                                        | Classification | Codes                                                                                                                                                                                                              | Register |
|----------------------------------------------------------|----------------|--------------------------------------------------------------------------------------------------------------------------------------------------------------------------------------------------------------------|----------|
| <b>Highly predisposing to severe Covid-19</b>            |                |                                                                                                                                                                                                                    |          |
| Organ or stem cell transplant                            | ICD-10         | T86, Z94                                                                                                                                                                                                           | 1,2      |
| Active cancer treatment                                  | ICD-10         | C00–C97 (except C44),<br>D05.1, D39                                                                                                                                                                                | 1,2      |
| Severe disorders of the immune system                    | ICD-10         | D70.8, D80–D84, E31.00                                                                                                                                                                                             | 2        |
| Severe chronic renal disease                             | ICD-10         | I12, I13, N00–N05, N07,<br>N08, N11, N14, N18, N19,<br>E10.2, E11.2, E14.2                                                                                                                                         | 1,2      |
| Asthma requiring continuous medication                   | ICD-10         | J45, J46                                                                                                                                                                                                           | 2, 3     |
|                                                          | ICPC-2         | R96                                                                                                                                                                                                                | 3        |
| Severe chronic pulmonary disease                         | ICD-10         | J41–J44, J47, Z90.2                                                                                                                                                                                                | 2        |
| Type 2 diabetes requiring medication                     | ICD-10         | E11, E13, E14                                                                                                                                                                                                      | 2,3      |
|                                                          | ICPC-2         | T90                                                                                                                                                                                                                | 3        |
| Blood glucose lowering drugs, excluding insulin          | ATC            | A10B                                                                                                                                                                                                               | 4        |
| Down syndrome                                            | ICD-10         | Q90                                                                                                                                                                                                                | 2, 3     |
| <b>Predisposing to severe Covid-19</b>                   |                |                                                                                                                                                                                                                    |          |
| Severe heart disease                                     | ICD-10         | I11–I13, I15, I20–I25, I50                                                                                                                                                                                         | 1, 2     |
| Neurological illness or condition that affects breathing | ICD-10         | G70–G73, G80–G83, I60–<br>I69                                                                                                                                                                                      | 2        |
| Immunosuppressive drug therapy for autoimmune disease    |                |                                                                                                                                                                                                                    |          |
| Autoimmune disease                                       | ICD-10         | D86, K50, K51, L40, M02,<br>M05–M07, M13.9, M45,<br>M46.0, M46.1, M46.9,<br>M94.1                                                                                                                                  | 1, 2     |
| Immunosuppressive drug therapy                           | ATC            | H02AB02, H02AB04,<br>H02AB06, H02AB07,<br>L01BA01, L01XC02,<br>L04AA06, L04AA10,<br>L04AA13, L04AA18,<br>L04AA24, L04AA26,<br>L04AA29, L04AA33,<br>L04AA37, L04AB, L04AC,<br>L04AD01, L04AD02,<br>L04AX01, L04AX03 | 4        |
| Severe chronic liver disease                             | ICD-10         | K70.2, K70.3, K70.4, K71–<br>K74                                                                                                                                                                                   | 2        |
| Type 1 diabetes                                          | ICD-10         | E10                                                                                                                                                                                                                | 2, 3     |
|                                                          | ICPC-2         | T89                                                                                                                                                                                                                | 3        |
| Insulin and analogues                                    | ATC            | A10A                                                                                                                                                                                                               | 4        |
| Adrenal insufficiency                                    | ICD-10         | E25.0, E27.1, E27.2, E27.4,<br>E31.00, E31.01, E31.08,<br>E89.6                                                                                                                                                    | 1, 2     |
| Sleep apnea                                              | ICD-10         | G47.3                                                                                                                                                                                                              | 2, 3     |
| Continuous positive airway pressure therapy              | NCSP           | WX723, WX780                                                                                                                                                                                                       | 2        |
| Psychotic disorders                                      | ICD-10         | F20–F29                                                                                                                                                                                                            | 2, 3     |
|                                                          | ICPC-2         | P72                                                                                                                                                                                                                | 3        |
| Clozapine                                                | ATC            | N05AH02                                                                                                                                                                                                            | 4        |

ATC, Anatomical Therapeutic Chemical Classification System; ICD-10, International Statistical Classification of Diseases and Related Health Problems, tenth revision; ICPC-2, International Classification of Primary Care, second edition; NCSP, Nordic Nomesco Classification of Surgical Procedures.

Registers: 1, Special Reimbursement Register for Medicine Expenses; 2, Care Register for Health Care; 3, Register of Primary Health Care Visits; 4, Prescription Centre database.
