# Supplementary material for: Effectiveness of vaccination against SARS-CoV-2 infection and Covid-19 hospitalisation among Finnish elderly and chronically ill—An interim analysis of a nationwide cohort study
Source: PubMed Central journal article supplement (PMC8601574; doi:10.1371/journal.pone.0258704), 2021-11-18
Supplement: pone.0258704.s002.pdf [file pone.0258704.s002.pdf]

**S2 Table:** Distribution of baseline characteristics and percentage vaccinated first with mRNA or adenovirus vector (AdV) vaccine, Finnish elderly aged 70+ years.

|                                                                        | Number of study subjects | Percentage vaccinated first with |             |
|------------------------------------------------------------------------|--------------------------|----------------------------------|-------------|
|                                                                        |                          | mRNA vaccine                     | AdV vaccine |
| <b>Age in years</b>                                                    |                          |                                  |             |
| 70-74                                                                  | 353956                   | 79                               | 10          |
| 75-79                                                                  | 231915                   | 86                               | 4           |
| 80-89                                                                  | 258389                   | 89                               | 1           |
| 90+                                                                    | 56832                    | 83                               | 1           |
| <b>Sex</b>                                                             |                          |                                  |             |
| Male                                                                   | 384170                   | 83                               | 6           |
| Female                                                                 | 516922                   | 85                               | 5           |
| <b>Presence of medical conditions predisposing to severe Covid-19</b>  |                          |                                  |             |
| No predisposing medical condition                                      | 376668                   | 83                               | 6           |
| At least one highly predisposing medical condition                     | 314949                   | 85                               | 5           |
| At least one predisposing but no highly predisposing medical condition | 209475                   | 85                               | 5           |
| <b>In Helsinki-Uusimaa hospital district</b>                           |                          |                                  |             |
| No                                                                     | 685004                   | 83                               | 6           |
| Yes                                                                    | 216088                   | 87                               | 2           |
| <b>In long-term care</b>                                               |                          |                                  |             |
| No                                                                     | 851206                   | 84                               | 5           |
| Yes                                                                    | 49886                    | 85                               | 0           |
