# Supplementary material for: Effectiveness of vaccination against SARS-CoV-2 infection and Covid-19 hospitalisation among Finnish elderly and chronically ill—An interim analysis of a nationwide cohort study
Source: PubMed Central journal article supplement (PMC8601574; doi:10.1371/journal.pone.0258704), 2021-11-18
Supplement: pone.0258704.s003.pdf [file pone.0258704.s003.pdf]

**S3 Table:** Distribution of baseline characteristics and percentage vaccinated first with mRNA or adenovirus vector (AdV) vaccine, chronically ill aged 16–69 years.

|                                                                        | Number of study subjects | Percentage vaccinated first with |             |
|------------------------------------------------------------------------|--------------------------|----------------------------------|-------------|
|                                                                        |                          | mRNA vaccine                     | AdV vaccine |
| <b>Age in years</b>                                                    |                          |                                  |             |
| 16-38                                                                  | 151887                   | 33                               | 4           |
| 39-51                                                                  | 151543                   | 50                               | 10          |
| 52-59                                                                  | 173280                   | 58                               | 19          |
| 60-64                                                                  | 138227                   | 55                               | 28          |
| 65-69                                                                  | 159589                   | 32                               | 54          |
| <b>Sex</b>                                                             |                          |                                  |             |
| Male                                                                   | 403410                   | 44                               | 24          |
| Female                                                                 | 371116                   | 48                               | 22          |
| <b>Presence of medical conditions predisposing to severe Covid-19</b>  |                          |                                  |             |
| At least one highly predisposing medical condition                     | 329664                   | 38                               | 37          |
| At least one predisposing but no highly predisposing medical condition | 444862                   | 51                               | 12          |
| <b>In Helsinki-Uusimaa hospital district</b>                           |                          |                                  |             |
| No                                                                     | 567944                   | 46                               | 22          |
| Yes                                                                    | 206582                   | 44                               | 27          |
