# Supplementary material for: Effectiveness of vaccination against SARS-CoV-2 infection and Covid-19 hospitalisation among Finnish elderly and chronically ill—An interim analysis of a nationwide cohort study
Source: PubMed Central journal article supplement (PMC8601574; doi:10.1371/journal.pone.0258704), 2021-11-18
Supplement: pone.0258704.s004.pdf [file pone.0258704.s004.pdf]

**S4 Table:** Crude and adjusted hazard ratios comparing the hazard of confirmed SARS-CoV-2 infection or Covid-19 hospitalization in study subjects who received exactly 1 or 2 doses of mRNA vaccine with the corresponding hazard in the unvaccinated, Finnish elderly aged 70+ years.

|                    | SARS-CoV-2 infection |       |       |                       |       |       | Covid-19 hospitalization |       |       |                       |       |       |
|--------------------|----------------------|-------|-------|-----------------------|-------|-------|--------------------------|-------|-------|-----------------------|-------|-------|
|                    | Crude hazard ratio   |       |       | Adjusted hazard ratio |       |       | Crude hazard ratio       |       |       | Adjusted hazard ratio |       |       |
|                    | Est.                 | LCI   | UCI   | Est.                  | LCI   | UCI   | Est.                     | LCI   | UCI   | Est.                  | LCI   | UCI   |
| <b>First dose</b>  |                      |       |       |                       |       |       |                          |       |       |                       |       |       |
| 0-6 DSV            | 0.773                | 0.624 | 0.956 | 0.669                 | 0.541 | 0.827 | 0.465                    | 0.270 | 0.801 | 0.425                 | 0.246 | 0.733 |
| 7-13 DSV           | 0.846                | 0.684 | 1.046 | 0.707                 | 0.572 | 0.875 | 0.644                    | 0.400 | 1.038 | 0.577                 | 0.357 | 0.931 |
| 14-20 DSV          | 0.766                | 0.607 | 0.966 | 0.618                 | 0.490 | 0.780 | 0.831                    | 0.538 | 1.285 | 0.734                 | 0.473 | 1.138 |
| 21-27 DSV          | 0.745                | 0.581 | 0.956 | 0.589                 | 0.459 | 0.755 | 0.498                    | 0.286 | 0.869 | 0.433                 | 0.248 | 0.758 |
| 28-34 DSV          | 0.693                | 0.527 | 0.911 | 0.534                 | 0.406 | 0.701 | 0.470                    | 0.263 | 0.841 | 0.414                 | 0.231 | 0.742 |
| 35-41 DSV          | 0.735                | 0.554 | 0.976 | 0.545                 | 0.411 | 0.722 | 0.411                    | 0.218 | 0.774 | 0.360                 | 0.191 | 0.680 |
| 42+ DSV            | 0.827                | 0.680 | 1.004 | 0.535                 | 0.441 | 0.650 | 0.386                    | 0.253 | 0.587 | 0.321                 | 0.208 | 0.496 |
| <b>Second dose</b> |                      |       |       |                       |       |       |                          |       |       |                       |       |       |
| 0-6 DSV            | 0.300                | 0.123 | 0.728 | 0.153                 | 0.063 | 0.371 | 0.267                    | 0.064 | 1.108 | 0.209                 | 0.050 | 0.877 |
| 7+ DSV             | 0.725                | 0.530 | 0.990 | 0.250                 | 0.181 | 0.347 | 0.087                    | 0.021 | 0.355 | 0.072                 | 0.017 | 0.300 |

DSV, day since vaccination; Est., Point estimate; LCI, lower 95% confidence interval limit; UCI, upper 95% confidence

interval limit
