# Supplementary material for: Effectiveness of vaccination against SARS-CoV-2 infection and Covid-19 hospitalisation among Finnish elderly and chronically ill—An interim analysis of a nationwide cohort study
Source: PubMed Central journal article supplement (PMC8601574; doi:10.1371/journal.pone.0258704), 2021-11-18
Supplement: pone.0258704.s005.pdf [file pone.0258704.s005.pdf]

**S5 Table:** Crude and adjusted hazard ratios comparing the hazard of confirmed SARS-CoV-2 infection or Covid-19 hospitalization in study subjects who received exactly 1 or 2 doses of mRNA vaccine with the corresponding hazard in the unvaccinated, chronically ill aged 16–69 years.

|                    | SARS-CoV-2 infection |       |       |                       |       |       | Covid-19 hospitalization |       |       |                       |       |       |
|--------------------|----------------------|-------|-------|-----------------------|-------|-------|--------------------------|-------|-------|-----------------------|-------|-------|
|                    | Crude hazard ratio   |       |       | Adjusted hazard ratio |       |       | Crude hazard ratio       |       |       | Adjusted hazard ratio |       |       |
|                    | Est.                 | LCI   | UCI   | Est.                  | LCI   | UCI   | Est.                     | LCI   | UCI   | Est.                  | LCI   | UCI   |
| <b>First dose</b>  |                      |       |       |                       |       |       |                          |       |       |                       |       |       |
| 0-6 DSV            | 0.568                | 0.438 | 0.737 | 0.612                 | 0.472 | 0.794 | 0.142                    | 0.035 | 0.574 | 0.129                 | 0.032 | 0.521 |
| 7-13 DSV           | 0.605                | 0.462 | 0.792 | 0.664                 | 0.506 | 0.870 | 0.242                    | 0.077 | 0.763 | 0.218                 | 0.069 | 0.687 |
| 14-20 DSV          | 0.519                | 0.380 | 0.708 | 0.575                 | 0.421 | 0.785 | 0.569                    | 0.249 | 1.304 | 0.511                 | 0.223 | 1.171 |
| 21-27 DSV          | 0.532                | 0.378 | 0.749 | 0.587                 | 0.417 | 0.827 | 0.120                    | 0.017 | 0.862 | 0.106                 | 0.015 | 0.764 |
| 28-34 DSV          | 0.392                | 0.251 | 0.614 | 0.424                 | 0.271 | 0.664 | 0.162                    | 0.022 | 1.168 | 0.139                 | 0.019 | 1.008 |
| 35-41 DSV          | 0.386                | 0.222 | 0.670 | 0.411                 | 0.236 | 0.714 | Not estimated            |       |       | Not estimated         |       |       |
| 42+ DSV            | 0.686                | 0.506 | 0.928 | 0.857                 | 0.632 | 1.161 | 0.411                    | 0.131 | 1.287 | 0.410                 | 0.131 | 1.288 |
| <b>Second dose</b> |                      |       |       |                       |       |       |                          |       |       |                       |       |       |
| 0-6 DSV            | 0.115                | 0.016 | 0.817 | 0.127                 | 0.018 | 0.906 | Not estimated            |       |       | Not estimated         |       |       |
| 7+ DSV             | 0.217                | 0.139 | 0.336 | 0.227                 | 0.146 | 0.353 | 0.095                    | 0.013 | 0.678 | 0.100                 | 0.014 | 0.710 |

DSV, day since vaccination; Est., Point estimate; LCI, lower 95% confidence interval limit; UCI, upper 95% confidence interval limit
