# Supplementary material for: Effectiveness of vaccination against SARS-CoV-2 infection and Covid-19 hospitalisation among Finnish elderly and chronically ill—An interim analysis of a nationwide cohort study
Source: PubMed Central journal article supplement (PMC8601574; doi:10.1371/journal.pone.0258704), 2021-11-18
Supplement: pone.0258704.s006.pdf [file pone.0258704.s006.pdf]

**S6 Table:** Crude and adjusted hazard ratios comparing the hazard of confirmed SARS-CoV-2 infection or Covid-19 hospitalization in study subjects who received exactly 1 or 2 doses of adenovirus vector vaccine with the corresponding hazard in the unvaccinated, chronically ill aged 16–69 years.

|                    | SARS-CoV-2 infection |       |       |                       |       |       | Covid-19 hospitalization |       |       |                       |       |       |
|--------------------|----------------------|-------|-------|-----------------------|-------|-------|--------------------------|-------|-------|-----------------------|-------|-------|
|                    | Crude hazard ratio   |       |       | Adjusted hazard ratio |       |       | Crude hazard ratio       |       |       | Adjusted hazard ratio |       |       |
|                    | Est.                 | LCI   | UCI   | Est.                  | LCI   | UCI   | Est.                     | LCI   | UCI   | Est.                  | LCI   | UCI   |
| <b>First dose</b>  |                      |       |       |                       |       |       |                          |       |       |                       |       |       |
| 0-6 DSV            | 0.492                | 0.373 | 0.649 | 0.599                 | 0.453 | 0.791 | 0.188                    | 0.047 | 0.757 | 0.157                 | 0.039 | 0.633 |
| 7-13 DSV           | 0.656                | 0.514 | 0.836 | 0.804                 | 0.630 | 1.027 | 1.163                    | 0.666 | 2.029 | 0.961                 | 0.548 | 1.685 |
| 14-20 DSV          | 0.498                | 0.373 | 0.665 | 0.620                 | 0.464 | 0.830 | 1.024                    | 0.560 | 1.874 | 0.838                 | 0.456 | 1.541 |
| 21-27 DSV          | 0.605                | 0.458 | 0.799 | 0.764                 | 0.578 | 1.011 | 0.414                    | 0.154 | 1.112 | 0.335                 | 0.124 | 0.903 |
| 28-34 DSV          | 0.406                | 0.281 | 0.587 | 0.518                 | 0.358 | 0.748 | 0.117                    | 0.016 | 0.831 | 0.093                 | 0.013 | 0.666 |
| 35-41 DSV          | 0.505                | 0.350 | 0.730 | 0.635                 | 0.438 | 0.919 | 0.815                    | 0.360 | 1.843 | 0.638                 | 0.281 | 1.449 |
| 42+ DSV            | 0.401                | 0.318 | 0.507 | 0.497                 | 0.393 | 0.630 | 0.564                    | 0.327 | 0.973 | 0.423                 | 0.243 | 0.736 |
| <b>Second dose</b> |                      |       |       |                       |       |       |                          |       |       |                       |       |       |
| 0-6 DSV            | 0.687                | 0.220 | 2.147 | 1.375                 | 0.439 | 4.309 | Not estimated            |       |       | Not estimated         |       |       |
| 7+ DSV             | Not estimated        |       |       | Not estimated         |       |       | Not estimated            |       |       | Not estimated         |       |       |

DSV, days since vaccination; Est., Point estimate; LCI, lower 95% confidence interval limit; UCI, upper 95% confidence

interval limit
